# Supplementary material for: Hypolipidemic activity of Dracocephalum kotschyi involves FOXO1 mediated modulation of PPARγ expression in adipocytes
Source: PubMed Central journal article supplement (PMC6208110; doi:10.1186/s12944-018-0893-3), 2018-10-30
Supplement: 12944_2018_893_MOESM1_ESM.pdf [file 12944_2018_893_MOESM1_ESM.pdf]

## Additional file 1

DKE's effect on mean body weights, food and water intakes in STZ-induced diabetic rats.

| Group             | Weeks | Body weight (g) | Food intake (g/rat.day) | Water intake (ml/rat.day) |
|-------------------|-------|-----------------|-------------------------|---------------------------|
| Normal control    | 1     | 227.17±4.70     | 21.64±1.87              | 34.00±2.07                |
|                   | 2     | 230.67±4.81     | 20.86±1.28*             | 35.12±1.86*               |
|                   | 3     | 239.67±6.47*    | 22.45±1.13*             | 39.45±0.82*               |
|                   | 4     | 256.83±8.01*    | 24.24±0.70*             | 39.83±1.26*               |
|                   | 5     | 264.83±6.47*    | 25.93±0.68*             | 45.93±0.96*               |
| Diabetic control  | 1     | 230.83±6.12     | 23.52±0.35              | 37.74±1.52                |
|                   | 2     | 224.17±5.84     | 27.67±0.32              | 64.36±5.78                |
|                   | 3     | 203.67±8.82     | 33.90±0.93              | 88.90±8.16                |
|                   | 4     | 186.00±7.09     | 40.69±0.54              | 95.93±4.72                |
|                   | 5     | 173.22±7.22     | 41.21±0.53              | 106.67±3.21               |
| DKE (0.25 ml/rat) | 1     | 238.67±8.31     | 26.62±3.87              | 36.81±0.89                |
|                   | 2     | 234.83±5.11     | 29.79±1.46              | 70.24±6.29                |
|                   | 3     | 229.67±6.01*    | 31.81±1.83              | 78.19±1.54                |
|                   | 4     | 228.33±5.57*    | 30.74±1.54*             | 87.64±2.26                |
|                   | 5     | 221.17±6.97*    | 29.69±0.92*             | 75.14±5.98*               |
| DKE (0.5 ml/rat)  | 1     | 244.17±7.65     | 25.12±1.91              | 39.17±1.41                |
|                   | 2     | 237.00±5.83     | 28.07±0.91              | 69.36±5.89                |
|                   | 3     | 233.00±6.13*    | 30.12±1.24*             | 77.02±2.91                |
|                   | 4     | 234.50±5.79*    | 29.52±0.79*             | 71.31±2.80*               |
|                   | 5     | 237.83±5.37*    | 26.90±1.83*             | 68.43±3.62*               |
| pioglitazone      | 1     | 230.67±8.30     | 22.26±1.70              | 40.38±1.10                |
|                   | 2     | 225.67±6.82     | 25.95±1.33              | 63.81±4.94                |
|                   | 3     | 228.83±5.76*    | 27.47±1.08*             | 69.21±4.02*               |
|                   | 4     | 219.67±6.57*    | 24.19±1.27*             | 59.00±3.66*               |
|                   | 5     | 221.83±4.52*    | 29.38±1.79*             | 58.90±1.23*               |

Data represent the mean ± SD (n = 6). \* P < 0.001 significantly different from diabetic control group
